# Supplementary material
Source: PubMed Central journal article supplement (PMC7480558)
Supplement: CJN.15241219SupplementaryData.pdf [file CJN.15241219SupplementaryData.pdf]

# **Mycophenolate Mofetil in C3 Glomerulopathy and Pathogenic Drivers of the Disease**

## **Supplemental Material Table of Contents**

### **Supplemental Methods**

**Complement genetics and molecular studies**

**Statistical analysis**

**Supplemental references**

### **Supplemental Tables**

**Supplemental Table 1:** Baseline clinical and histologic characteristics according to age groups.

**Supplemental Table 2:** Complement pathogenic gene variants in the study patients.

**Supplemental Table 3:** Clinical characteristics according to the presence of complement genetic variants and/or autoantibodies against complement components.

**Supplemental Table 4:** Clinical characteristics of patients who achieved or not remission, according to baseline eGFR.

**Supplemental Table 5:** Multivariable logistic regression analysis for predictors of remission of the disease.

**Supplemental Table 6:** Clinical characteristics according to the development of kidney failure.

**Supplemental Table 7:** Cox proportional hazard regression analysis for association between covariables and kidney failure.

**Supplemental Table 8:** Clinical and histopathologic characteristics of patients before and after propensity score matching analysis.

**Supplemental Table 9:** Cox proportional hazard regression analysis for predictors of no response to corticosteroids plus mycophenolate mofetil.

**Supplemental Table 10:** Clinical, histopathologic and genetic characteristics of patients treated with mycophenolate mofetil plus corticosteroids according to relapse of the disease.

**Supplemental Table 11:** Cox proportional hazard regression analysis for predictors of relapse in patients treated with corticosteroids plus mycophenolate mofetil

### **Supplemental Figures**

**Supplemental Figure 1:** Dot plot for the propensity scores of patients in the MMF and non-MMF groups showing individual units in the dataset and whether they were matched or not.

**Supplemental Figure 2:** Kaplan-Meier curves for kidney survival according to clustering analysis in patients treated with corticosteroids plus MMF versus other regimens

## **Supplemental Methods:**

### **Complement genetics and molecular studies**

Genomic DNA was prepared from peripheral blood cells according to standard procedures. The entire set of complement genes (Complement gene panel 2) was analyzed in all samples by next generation sequencing (NGS) using the MiSeq next generation sequencing platform (Illumina, USA). In addition, copy number variation (CNV) analysis of the *CFH-CFHR* region was performed by Multiplex Ligation-dependent Probe Amplification (MLPA). European non-Finish population from gnomAD database was used as a control population. Variants found in coding and flanking regions were considered; synonym changes were excluded. Variants with a minor allele frequency (MAF) of 1% or lower were identified as rare variants and classified according to their pathogenicity. Only variants in the candidate genes *CFH*, *CFI*, *C3* and *CFB* or genomic rearrangements in the *CFHRs* were considered pathogenic. A variant was categorized as pathogenic if there was experimental evidence of reduced protein levels or altered function, or when at least 4 out of 6 bioinformatic predictors (SIFT, Polyphen, MutTast, MutAss, FATHMM, CADD) indicated pathogenicity. A variant was considered benign when functional data demonstrated normal protein levels and function, or 4 out of 6 predictors classified it as benign. A variant of unknown significance was considered when none of the other two criteria were met.

Serum levels of C3 and C4 were quantified using nephelometric method.

Plasma levels of C5 and sC5b-9 were quantified by in-house enzyme-linked immunosorbent assays (ELISA). The detection of anti-FH antibodies and C3 nephritic factor was performed by ELISA and hemolytic assays as previously described<sup>S1,S2</sup>, respectively.

### **Supplemental References:**

S1. Abarrategui-Garrido C, Martínez-Barricarte R, López-Trascasa M *et al.* Characterization of complement factor H-related (CFHR) proteins in plasma reveals novel genetic variations of CFHR1 associated with atypical hemolytic uremic syndrome. *Blood* 2009; **114**: 4261–4271.

S2. Paixão-Cavalcante D, López-Trascasa M, Skattum L *et al.* Sensitive and specific assays for C3 nephritic factors clarify mechanisms underlying complement dysregulation. *Kidney Int.* 2012; **82**: 1084–1092.

## **Statistical analysis**

Retrospective, multicenter observational cohort study. Descriptive statistics are presented as mean  $\pm$  standard deviation, or median and interquartile ranges (IQR) for continuous variables, and absolute values and percentages for categorical variables.

Parametric and non-parametric tests were chosen as appropriate for descriptive comparisons of continuous variables, and chi-squared test for categorical variables. For the comparisons in smaller groups we performed a Fisher's exact test.

Cox proportional hazards regression and logistic regression models were used to analyze the main determinants of outcomes. The proportional hazard assumption was checked graphically (log–log Kaplan–Meier curves) for all covariates. These covariates in multivariable models were selected on the basis of prior knowledge and using the backwards progressive conditional elimination process.

Due to the observational nature of the study, patients were not randomly assigned to receive treatments. Thus, to minimize confounding by indication, a propensity-score matching analysis was applied to compare kidney outcomes of patients treated with or without MMF (excluding patients with conservative management), adjusting for the following potential confounding variables: baseline serum creatinine, degree of interstitial fibrosis and tubular atrophy, percentage of glomerulosclerosis and subtype of C3 glomerulopathy (C3 glomerulonephritis or dense deposit disease). A 1:1 nearest neighbor matching algorithm was applied with a caliper of 0.2 without replacement. To evaluate the quality of the different propensity-score matching models, we assessed the balance in before and after matching between the groups.

A  $P < 0.05$  was considered to be significant. Analyses were performed using IBM SPSS Statistics 24.0 (IBM Corp., Armonk, NY, USA) and GraphPad Prism version 7.00 (GraphPad Software, La Jolla, California, USA). The propensity-score matching was performed using SPSS R-Menu using in both cases the R statistical software version R3.1.1.

**Supplemental Table 1:** Baseline clinical and histologic characteristics according to age groups.

| <b>Variable</b>                             | <b>Age &lt;18 years old<br/>(n=26)</b> | <b>Age &gt;18 years old<br/>(n=71)</b> |
|---------------------------------------------|----------------------------------------|----------------------------------------|
| <b>Baseline</b>                             |                                        |                                        |
| Age at diagnosis, years                     | 9±4                                    | 39±17                                  |
| Gender, males (%)                           | 13 (50)                                | 41 (58)                                |
| C3 glomerulonephritis/Dense deposit disease | 21 / 5                                 | 60 / 11                                |
| Antecedent infection, N (%)                 | 10 (39)                                | 16 (23)                                |
| Clinical presentation, N (%)                |                                        |                                        |
| Nephrotic syndrome                          | 12 (46)                                | 27 (38)                                |
| Nephritic syndrome                          | 7 (27)                                 | 22 (31)                                |
| Asymptomatic urinary abnormalities          | 7 (27)                                 | 22 (31)                                |
| Serum creatinine, mg/dl                     | 0.6 [0.4–0.9]                          | 1.9 [1.2–3.5]                          |
| CKD stages at baseline, N (%)               |                                        |                                        |
| 1–2                                         | 21 (81)                                | 20 (28)                                |
| 3                                           | 2 (8)                                  | 19 (27)                                |
| 4–5                                         | 3 (12)                                 | 32 (45)                                |
| Albumin, g/dl                               | 2.9±0.8                                | 3.1±0.8                                |
| Proteinuria, g/24h                          | 2.3 [1.2–3.5]                          | 3.1 [1.6–8]                            |
| Serum C3 <sup>a</sup> , mg/dl               | 42±30                                  | 67±39                                  |
| Low serum C3, N (%)                         | 21 (81)                                | 45 (63)                                |
| Serum C4 <sup>b</sup> , mg/dl               | 24±10                                  | 24±9                                   |
| Serum C5b–9 <sup>c</sup> , mg/l             | 486 [243–1260]                         | 263 [144–763]                          |
| Elevated serum C5b–9, N (%)                 | 24 (100)                               | 58 (86)                                |
| Complement pathogenic variants, N (%)       | 4 (15)                                 | 14 (20)                                |
| Autoantibodies*, N (%)                      | 10 (39)                                | 19 (27)                                |
| <b>Histopathology</b>                       |                                        |                                        |
| Light microscopy pattern, N (%)             |                                        |                                        |
| Membranoproliferative GN                    | 21 (80)                                | 49 (69)                                |
| Diffuse endocapillary proliferative GN      | 2 (8)                                  | 5 (7)                                  |
| Mesangial proliferative GN                  | 2 (8)                                  | 13 (18)                                |
| Diffuse sclerosing GN                       | 1 (4)                                  | 4 (6)                                  |
| Globally sclerotic glomeruli, %             | 3 [0–5]                                | 11 [0–30]                              |
| Segmental sclerotic glomeruli, N (%)        | 3 (12)                                 | 13 (18)                                |
| Cellular or fibrocellular crescents, N (%)  | 8 (30)                                 | 16 (23)                                |
| Tubular atrophy/interstitial fibrosis, N %  |                                        |                                        |
| Absence                                     | 20 (77)                                | 16 (23)                                |
| Mild                                        | 4 (15)                                 | 28 (39)                                |
| Moderate                                    | 1 (4)                                  | 18 (25)                                |
| Severe                                      | 1 (4)                                  | 9 (13)                                 |
| Arterio- and arteriolosclerosis, %          | 0 (0)                                  | 24 (34)                                |

\* Including C3 nephritic factor and anti-factor H

Continuous variables are presented as mean±standard deviation, or median [interquartile range]

**Abbreviations:** eGFR: estimated glomerular filtration rate; GN: glomerulonephritis

<sup>a</sup> Reference values: 75–135

<sup>b</sup> Reference values: 14–60

<sup>c</sup> Reference values: <100

**Supplemental Table 2:** Complement pathogenic gene variants in the study patients.

| Patient | Ethnicity | Age/gender | C3G/C3Nef      | Genetic Variants                       | RefSNPs     | Categorization  | References for previously reported mutations                                                                                                               |
|---------|-----------|------------|----------------|----------------------------------------|-------------|-----------------|------------------------------------------------------------------------------------------------------------------------------------------------------------|
| 1       | Caucasian | 22/M       | C3GN<br>C3Nef- | C3: c.1656G>C; p.Trp552Cys (Het)       | -           | Pathogenic (RL) | Osborne et al. (2018) J Immunol. 200(7):2464-2478                                                                                                          |
| 2       | Caucasian | 19/M       | DDD<br>C3Nef-  | CFHR1: Dup.(E2-E6) (Het)               | -           | Pathogenic (AF) | Tortajada et al. (2013) J Clin Invest. 123(6).                                                                                                             |
| 3       | Caucasian | 21/M       | C3GN<br>C3Nef- | C3: c.1379T>G; p.Val460Gly (Het)       | -           | Pathogenic (RL) | Not previously described                                                                                                                                   |
| 4       | Caucasian | 47/M       | C3GN<br>C3Nef- | CFI: c.1234G>A; p.Val412Met (Het)      | rs371432629 | Pathogenic (RL) | Pras et al. (2015) J Med Genet. 52(7):484-92.<br>Osborne et al. (2018) J Immunol. 200(7):2464-2478                                                         |
| 5       | Caucasian | 9/M        | C3GN<br>C3Nef- | C3: c.1269+1G>A (Het)                  | -           | Pathogenic (RL) | Osborne et al. (2018) J Immunol. 200(7):2464-2478                                                                                                          |
| 6       | Caucasian | 4/M        | C3GN<br>C3Nef- | C3: c.2770G>A; p.Gly924Ser (Het)       | -           | Pathogenic (RL) | Osborne et al. (2018) J Immunol. 200(7):2464-2478                                                                                                          |
| 7       | Caucasian | 23/F       | C3GN<br>C3Nef- | C3: c.2203C>T; p.Arg735Trp (Het)       | rs117793540 | Pathogenic (RL) | Frémeaux-Bacchi et al. (2008) Blood, 112(13):4948-4952<br>Osborne et al. (2018) J Immunol. 200(7):2464-2478                                                |
| 8       | Caucasian | 28/M       | C3GN<br>C3Nef- | CFI: c.1071T>G; p.Ile357Met (Het)      | rs200881135 | Pathogenic (RL) | Westra (2010) Nephrol Dial Transplant 25, 2195-2202<br>Osborne et al. (2018) J Immunol. 200(7):2464-2478                                                   |
| 9       | Caucasian | 57/M       | DDD<br>C3Nef-  | CFH: c.328G>T; p. Ala110Ser (Hom)      | -           | Pathogenic (RL) | Martin-Merinerio et al. (2018) Kidney International.                                                                                                       |
| 10      | Caucasian | 20/M       | C3GN<br>C3Nef- | CFHR1: Dup.(PROM-E3) (Het)             | -           | Pathogenic (AF) | Not previously described                                                                                                                                   |
| 11      | Caucasian | 26/M       | DDD<br>C3Nef-  | C3: c.1898A>G; Lys633Arg (Het)         | rs140655115 | Pathogenic (RL) | Moore I, et. al. (2010) Blood. 115(2):379-87<br>Iatropoulos et al. (2016) Mol Immunol.71:131-142.<br>Osborne et al. (2018) J Immunol. 200(7):2464-2478     |
| 12      | Caucasian | 22/F       | C3GN<br>C3Nef- | C3: c.4339T>C; p.Tyr1447His (Het)      | -           | Pathogenic (RL) | Not previously described                                                                                                                                   |
| 13      | Caucasian | 26/M       | C3GN<br>C3Nef- | CFH: c.328G>T; p.Ala110Ser (Het)       | -           | Pathogenic (RL) | Martin-Merinerio et al. (2018) Kidney International                                                                                                        |
| 14      | Caucasian | 53/M       | C3GN<br>C3Nef+ | CFH: c.1132G>T; p.Gly378* (Het)        | -           | Pathogenic (RL) | Not previously described                                                                                                                                   |
| 15      | Caucasian | 12/M       | C3GN<br>C3Nef- | CFHR3::CFHR1 hybrid gene (Het)         | -           | Pathogenic (AF) | Not previously described                                                                                                                                   |
| 16      | Caucasian | 34/M       | C3GN<br>C3Nef- | C3: c.3481C>A; p.Gln1161Lys (Het)      | -           | Pathogenic (AF) | Frémeaux-Bacchi et al. (2008) Blood, 112(13):4948-4952<br>Schramm (2015) Blood 9; 125(15): 2359–2369.<br>Osborne et al. (2018) J Immunol. 200(7):2464-2478 |
| 17      | Caucasian | 53/M       | C3GN<br>C3Nef+ | CFI: c.1508_1510del; p.Phe503del (Het) | -           | Pathogenic (RL) | Not previously described                                                                                                                                   |
| 18      | Caucasian | 24/M       | C3GN<br>C3Nef- | CFB: c.724A>C; p.Ile242Leu (Het)       | rs144812066 | Pathogenic (AF) | Marinozzi et al. (2014) J. Am. Soc Nephrol. 25(9)                                                                                                          |

Abbreviations: C3G: C3 glomerulopathy; C3Nef: C3 nephritic factor; F: female; Het: heterozygote; Hom: homozygote; M: male.

Pathogenicity is indicated and the consequences of the mutations depicted as follows: RL, Reduced Levels; AF, Altered Function

**Supplemental Table 3:** Clinical characteristics according to the presence of complement genetic variants and/or autoantibodies against complement components\*.

| <b>Variable</b>                                 | <b>Pathogenic variants<br/>(n=18)</b> | <b>Variants of unknown significance<br/>(n=42)</b> | <b>No complement abnormalities<br/>(n=37)</b> | <b>P</b> | <b>Presence of autoantibodies*<br/>(n=29)</b> | <b>Absence of autoantibodies<br/>(n=68)</b> | <b>P</b> |
|-------------------------------------------------|---------------------------------------|----------------------------------------------------|-----------------------------------------------|----------|-----------------------------------------------|---------------------------------------------|----------|
| Age at diagnosis, years                         | 26±15                                 | 36±22                                              | 30±20                                         | 0.17     | 31±21                                         | 32±20                                       | 0.84     |
| <18 years % / >18 years %                       | 4 / 14                                | 9 / 33                                             | 13 / 24                                       | 0.34     | 10 / 19                                       | 16 / 52                                     | 0.26     |
| Gender, males (%)                               | 16 (89)                               | 21 (50)                                            | 17 (46)                                       | 0.007    | 13 (45)                                       | 41 (60)                                     | 0.16     |
| C3 glomerulonephritis /Dense deposit disease    | 15(83) / 3(17)                        | 36(86) / 6(14)                                     | 30(81) / 7(19)                                | 0.75     | 20(69) / 9(31)                                | 61(90) / 7(10)                              | 0.01     |
| Antecedent infection, N (%)                     | 6 (33)                                | 9 (21)                                             | 11 (30)                                       | 0.56     | 13 (45)                                       | 41 (60)                                     | 0.16     |
| Clinical presentation, N (%)                    |                                       |                                                    |                                               | 0.88     |                                               |                                             | 0.66     |
| Nephrotic syndrome                              | 7 (39)                                | 19 (45)                                            | 13 (35)                                       |          | 12 (41)                                       | 27 (40)                                     |          |
| Nephritic syndrome                              | 5 (28)                                | 11 (26)                                            | 13 (35)                                       |          | 7 (24)                                        | 22 (32)                                     |          |
| Asymptomatic urinary abnormalities              | 6 (33)                                | 12 (29)                                            | 11 (30)                                       |          | 10 (35)                                       | 19 (28)                                     |          |
| Serum creatinine, mg/dl                         | 1.3 [0.8–2.9]                         | 1.5 [0.8–3]                                        | 1.8 [0.7–3.3]                                 | 0.78     | 1.2 [0.8–2.5]                                 | 1.5 [0.7–3.2]                               | 0.48     |
| eGFR at diagnosis, ml/min/1.73m <sup>2</sup>    | 59 [24–119]                           | 56 [18–117]                                        | 39 [17–129]                                   | 0.89     | 59 [24–137]                                   | 50 [16–117]                                 | 0.37     |
| Albumin, g/dl                                   | 3.2±0.8                               | 3±0.8                                              | 3.1±0.8                                       | 0.62     | 3±0.9                                         | 3.1±0.8                                     | 0.85     |
| Proteinuria, g/24h                              | 3 [1.2–7.7]                           | 3 [1.8–5]                                          | 3 [1.7–9]                                     | 0.68     | 3.4 [2.4–9.7]                                 | 2.7 [1.5–5.3]                               | 0.10     |
| Serum C3 <sup>a</sup> , mg/dl                   | 47±30                                 | 67±41                                              | 63±43                                         | 0.25     | 49±38                                         | 66±40                                       | 0.04     |
| Serum C5b–9 <sup>b</sup> , mg/l                 | 430 [220-843]                         | 213 [135-615]                                      | 370 [211-1060]                                | 0.14     | 618 [205-1042]                                | 260 [155-620]                               | 0.02     |
| Concomitant presence of autoantibodies**, N (%) | 2 (11)                                | 12 (29)                                            | 15 (41)                                       | 0.08     | –                                             | –                                           | –        |

\* Information regarding complement pathogenic abnormalities is provided in Supplemental Table 2

\*\* Including C3 nephritic factor and anti-factor H.

Continuous variables are presented as mean±standard deviation, or median [interquartile range]

**Abbreviations:** eGFR: estimated glomerular filtration rate

<sup>a</sup> Reference values: 75–135

<sup>b</sup> Reference values:<100



**Supplemental Table 4:** Clinical characteristics of patients who achieved or not remission, according to baseline eGFR (classified into three groups: <30; 31-59; >60 ml/min/1.73m<sup>2</sup>)

| Variable                                     | Remission (complete + partial) |                      |                    | P      | No remission                |                      |                    | P      |
|----------------------------------------------|--------------------------------|----------------------|--------------------|--------|-----------------------------|----------------------|--------------------|--------|
|                                              | Baseline eGFR >60<br>(n=25)    | eGFR 31-59<br>(n=11) | eGFR <30<br>(n=10) |        | Baseline eGFR >60<br>(n=16) | eGFR 31-59<br>(n=10) | eGFR <30<br>(n=25) |        |
| Age at diagnosis, years                      | 18±12                          | 34±16                | 39±27              | 0.003  | 19±13                       | 40±15                | 47±20              | <0.001 |
| Adult % / Pediatric %                        | 44 / 56                        | 91 / 9               | 70 / 30            | 0.06   | 56 / 44                     | 90 / 10              | 100 / 0            | <0.001 |
| Gender, males (%)                            | 9 (36)                         | 6 (55)               | 6 (60)             | 0.35   | 7 (44)                      | 8 (80)               | 18 (72)            | 0.09   |
| C3 glomerulonephritis /Dense deposit disease | 22 / 3                         | 10 / 1               | 10 / 0             | 0.28   | 10 / 6                      | 8 / 2                | 21 / 4             | 0.13   |
| Antecedent infection, N (%)                  | 5 (20)                         | 0 (0)                | 5 (50)             | 0.15   | 4 (25)                      | 3 (30)               | 9 (36)             | 0.76   |
| Clinical presentation, N (%)                 |                                |                      |                    | 0.55   |                             |                      |                    | 0.77   |
| Nephrotic syndrome                           | 13 (52)                        | 3 (27)               | 1 (10)             |        | 10 (63)                     | 4 (40)               | 8 (32)             |        |
| Nephritic syndrome                           | 4 (16)                         | 3 (27)               | 7 (70)             |        | 1 (6)                       | 2 (20)               | 12 (48)            |        |
| Asymptomatic urinary abnormalities           | 8 (32)                         | 5 (46)               | 2 (20)             |        | 5 (31)                      | 4 (40)               | 5 (20)             |        |
| Serum creatinine, mg/dl                      | 0.7 [0.5-0.8]                  | 1.4 [1.3-1.9]        | 4.2 [2.7-5.8]      | <0.001 | 0.8 [0.5-1]                 | 1.6 [1.3-1.9]        | 3.5 [3-6.6]        | <0.001 |
| Albumin, g/dl                                | 3.2±0.9                        | 3.2±0.8              | 3.2±0.8            | 0.97   | 2.8±0.8                     | 2.9±0.7              | 3.1±0.8            | 0.51   |
| Proteinuria, g/24h                           | 2.5 [1.3-3.2]                  | 4.1 [1.2-7.9]        | 2.4 [1.6-3.3]      | 0.32   | 4.5 [2.8-5.9]               | 4.5 [1.3-10]         | 4.1 [1.7-9]        | 0.68   |
| Serum C3 <sup>a</sup> , mg/dl                | 41±31                          | 66±50                | 73±40              | 0.05   | 58±42                       | 69±45                | 72±34              | 0.52   |
| Serum C5b-9 <sup>b</sup> , mg/l              | 441 [177-1129]                 | 329 [125-587]        | 303 [191-719]      | 0.58   | 475 [290-1036]              | 843 [281-1331]       | 191[124-513]       | 0.006  |
| Complement pathogenic variants*, N (%)       | 3 (12)                         | 3 (27)               | 0 (0)              | 0.34   | 5 (31)                      | 3 (30)               | 4 (33)             | 0.74   |
| Autoantibodies**, N (%)                      | 9 (36)                         | 2 (18)               | 3 (30)             | 0.56   | 4 (25)                      | 4 (40)               | 7 (28)             | 0.70   |
| <b>Histopathology</b>                        |                                |                      |                    |        |                             |                      |                    |        |
| Light microscopy pattern, N (%)              |                                |                      |                    | 0.003  |                             |                      |                    | 0.27   |
| Membranoproliferative GN                     | 19 (76)                        | 7 (64)               | 4 (40)             |        | 14 (88)                     | 6 (60)               | 15 (60)            |        |
| Diffuse endocapillary proliferative GN       | 3 (12)                         | 2 (18)               | 0 (0)              |        | 0 (0)                       | 0 (0)                | 2 (8)              |        |
| Mesangial proliferative GN                   | 2 (8)                          | 2 (18)               | 3 (30)             |        | 1 (6)                       | 2 (20)               | 2 (8)              |        |
| Diffuse sclerosing GN                        | 1 (4)                          | 0 (0)                | 3 (30)             |        | 1 (6)                       | 2 (2)                | 1 (4)              |        |
| Globally sclerotic glomeruli, %              | 0 [0-5]                        | 5 [0-23]             | 8 [0-28]           | 0.03   | 2.6 [0-19]                  | 7.2 [0-20]           | 31 [20-59]         | <0.001 |
| Cellular or fibrocellular crescents, N (%)   | 3 (12)                         | 2 (18)               | 6 (60)             | 0.01   | 3 (19)                      | 3 (30)               | 7 (28)             | 0.54   |
| Tubular atrophy/interstitial fibrosis, N %   |                                |                      |                    |        |                             |                      |                    | <0.001 |
| Absence                                      | 14 (56)                        | 4 (36)               | 4 (40)             |        | 10 (63)                     | 2 (20)               | 2 (8)              |        |
| Mild                                         | 9 (36)                         | 5 (46)               | 5 (50)             |        | 3 (19)                      | 5 (50)               | 5 (20)             |        |
| Moderate                                     | 1 (4)                          | 2 (18)               | 0 (0)              |        | 2 (13)                      | 2 (20)               | 12 (48)            |        |
| Severe                                       | 1 (4)                          | 0 (0)                | 1 (10)             |        | 1 (6)                       | 1 (10)               | 6 (24)             |        |
| <b>Treatment</b>                             |                                |                      |                    | 0.43   |                             |                      |                    | 0.07   |
| No immunosuppression, N (%)                  | 3 (12)                         | 0 (0)                | 0 (0)              |        | 1 (6)                       | 1 (10)               | 12 (48)            |        |
| Corticosteroids + MMF, N (%)                 | 15 (60)                        | 10 (91)              | 8 (80)             |        | 4 (25)                      | 3 (30)               | 2 (8)              |        |
| Other immunosuppression, N (%)               | 6 (24)                         | 0 (0)                | 1 (10)             |        | 9 (56)                      | 5 (50)               | 8 (32)             |        |
| Eculizumab, N (%)                            | 1 (33)                         | 1 (9)                | 1 (10)             |        | 2 (13)                      | 1 (10)               | 3 (12)             |        |

\* Information regarding complement abnormalities is provided in Supplemental Table 2

\*\* Including C3 nephritic factor and anti-factor H.

Continuous variables are presented as mean±standard deviation, or median [interquartile range]

<sup>a</sup> Reference values: 75–135

<sup>b</sup> Reference values: <100

**Supplemental Table 5:** Multivariable logistic regression analysis for predictors of remission of the disease\*

| <b>Variable</b>                                            | <i>Univariable</i>             |              | <i>Multivariable</i>           |              |
|------------------------------------------------------------|--------------------------------|--------------|--------------------------------|--------------|
|                                                            | <b>Odds ratio<br/>(95% CI)</b> | <b>P</b>     | <b>Odds ratio<br/>(95% CI)</b> | <b>P</b>     |
| <b>Gender (female vs male)</b>                             | <b>0.16 (0.25–1.00)</b>        | <b>0.05</b>  | <b>0.18 (0.53–0.61)</b>        | <b>0.006</b> |
| <b>Age (pediatric vs adult)</b>                            | <b>0.21 (0.03–1.30)</b>        | <b>0.09</b>  | <b>0.21 (0.05–0.82)</b>        | <b>0.02</b>  |
| C3 glomerulonephritis/dense deposit disease                | 0.23 (0.03–1.64)               | 0.14         |                                |              |
| CKD stages at baseline                                     |                                |              |                                |              |
| 3 versus 1–2                                               | 1.19 (0.19–7.38)               | 0.84         |                                |              |
| 4–5 versus 1–2                                             | 0.56 (0.07–4.72)               | 0.59         |                                |              |
| <b>24-hour proteinuria (&lt;3.5g/24h vs &gt;3.5 g/24h)</b> | <b>0.12 (0.02–0.54)</b>        | <b>0.006</b> | <b>0.15 (0.04–0.51)</b>        | <b>0.003</b> |
| Serum C3 levels (low vs high)                              | 4.67 (0.91–12.3)               | 0.06         |                                |              |
| Complement pathogenic variants (no vs yes)                 | 0.43 (0.14–2.75)               | 0.42         |                                |              |
| Autoantibodies against complement regulators (no vs yes)   | 1.16 (0.24–5.62)               | 0.85         |                                |              |
| Glomerulosclerosis                                         |                                |              |                                |              |
| 25–50% vs <25%                                             | 1.38 (0.14–3.76)               | 0.67         |                                |              |
| 50–75% vs <25%                                             | 3.2 (0.26–8.22)                | 0.23         |                                |              |
| >75% vs <25%                                               | 0.4 (0.07–2.72)                | 0.39         |                                |              |
| Interstitial fibrosis/tubular atrophy                      |                                |              |                                |              |
| 25–50% vs <25%                                             | 3.11 (0.49–8.64)               | 0.23         |                                |              |
| 50–75% vs <25%                                             | 0.58 (0.05–6.82)               | 0.66         |                                |              |
| >75% vs <25%                                               | 0.41 (0.02–7.11)               | 0.54         |                                |              |
| <b>Treatment with MMF plus corticosteroids (no vs yes)</b> | <b>3.36 (2.48–4.68)</b>        | <b>0.001</b> | <b>5.72 (4.48–7.08)</b>        | <b>0.001</b> |

\*Number of events: 46

Abbreviations: CI: confidence interval; CKD: chronic kidney disease; MMF: mycophenolate mofetil; vs: versus

**Supplemental Table 6:** Clinical characteristics according to the development of kidney failure.

| <b>Variable</b>                                  | <b>Kidney failure</b> | <b>No kidney failure</b> | <b>p</b> |
|--------------------------------------------------|-----------------------|--------------------------|----------|
| <b>Baseline</b>                                  |                       |                          |          |
| Patients, N (%)                                  | 40 (41)               | 57 (59)                  |          |
| Age at diagnosis, years                          | 36±19                 | 28±21                    | 0.06     |
| Adult % / Pediatric %                            | 88 / 12               | 63 / 37                  | 0.008    |
| Gender, males (%)                                | 27 (68)               | 27 (47)                  | 0.04     |
| C3 glomerulonephritis / Dense deposit disease, N | 30 / 10               | 51 / 6                   | 0.06     |
| Antecedent infection, N (%)                      | 14 (35)               | 12 (21)                  | 0.12     |
| Clinical presentation, N (%)                     |                       |                          | 0.63     |
| Nephrotic syndrome                               | 16 (40)               | 23 (40)                  |          |
| Nephritic syndrome                               | 13 (32)               | 16 (28)                  |          |
| Asymptomatic urinary abnormalities               | 11 (28)               | 18 (32)                  |          |
| Serum creatinine, mg/dl                          | 2.8 [1.2–4.3]         | 1 [0.7–2]                | <0.001   |
| eGFR at diagnosis, ml/min/1.73m <sup>2</sup>     | 24 [11–60]            | 100 [34–114]             | <0.001   |
| Albumin, g/dl                                    | 3±0.8                 | 3.1±0.8                  | 0.31     |
| Proteinuria, g/24h                               | 4.4 [1.8–9]           | 2.7 [1.2–4.2]            | 0.02     |
| Serum C3 <sup>a</sup> , mg/dl                    | 64±35                 | 59±43                    | 0.53     |
| Complement pathogenic variants, N (%)            | 9 (23)                | 9 (16)                   | 0.40     |
| Autoantibodies*, N (%)                           | 15 (38)               | 16 (28)                  | 0.33     |
| Serum C5b–9 <sup>b</sup> , mg/l                  | 298 (144-770)         | 394 (188-892)            | 0.25     |
| <b>Histopathology</b>                            |                       |                          |          |
| Light microscopy pattern, N (%)                  |                       |                          | 0.54     |
| Membranoproliferative GN                         | 29 (73)               | 41 (72)                  |          |
| Diffuse endocapillary proliferative GN           | 1 (2)                 | 6 (11)                   |          |
| Mesangial proliferative GN                       | 8 (20)                | 7 (12)                   |          |
| Diffuse sclerosing GN                            | 2 (5)                 | 3 (5)                    |          |
| Globally sclerotic glomeruli, %                  | 22 [6–40]             | 4 [0–8]                  | <0.001   |
| Cellular or fibrocellular crescents, N (%)       | 10 (25)               | 14 (25)                  | 0.96     |
| Tubular atrophy/interstitial fibrosis, N %       |                       |                          | <0.001   |
| Absence                                          | 10 (25)               | 26 (46)                  |          |
| Mild                                             | 8 (20)                | 24 (42)                  |          |
| Moderate                                         | 14 (35)               | 5 (9)                    |          |
| Severe                                           | 8 (20)                | 2 (4)                    |          |
| Arterio- and arteriosclerosis, %                 | 13 (33)               | 11 (19)                  | 0.14     |
| <b>Treatment and Outcomes</b>                    |                       |                          |          |
| No immunosuppression, N (%)                      | 11 (28)               | 6 (11)                   | <0.001   |
| Corticosteroids + MMF, N (%)                     | 6 (15)                | 36 (63)                  |          |
| Other immunosuppression, N (%)                   | 17 (42)               | 12 (21)                  |          |
| Eculizumab, N (%)                                | 6 (15)                | 3 (5)                    |          |
| Remission (complete+partial), N (%)              | 0 (0)                 | 46 (81)                  | <0.001   |

\* Including C3 nephritic factor and anti-factor H

Continuous variables are presented as mean±standard deviation, or median [interquartile range]

Abbreviations: eGFR: estimated glomerular filtration rate; GN: glomerulonephritis; MMF: mycophenolate mofetil

<sup>a</sup> Reference values: 75–135

<sup>b</sup> Reference values: <100

**Supplemental Table 7:** Cox proportional hazard regression analysis for association between covariables and kidney failure\*.

| <b>Variable</b>                                          | <i>Univariable</i>               |             | <i>Multivariable</i>             |              |
|----------------------------------------------------------|----------------------------------|-------------|----------------------------------|--------------|
|                                                          | <b>Hazard ratio<br/>(95% CI)</b> | <b>P</b>    | <b>Hazard ratio<br/>(95% CI)</b> | <b>P</b>     |
| Gender (female vs male)                                  | 2.94 (1.01–8.53)                 | 0.05        |                                  |              |
| Age (pediatric vs adult)                                 | 1.18 (0.23–6.03)                 | 0.84        |                                  |              |
| Antecedent infection (no vs yes)                         | 1.47 (0.59–3.65)                 | 0.41        |                                  |              |
| C3 glomerulonephritis/Dense deposit disease              | 2.45 (0.77–7.85)                 | 0.13        |                                  |              |
| <b>CKD stages at baseline</b>                            |                                  |             |                                  |              |
| <b>3 versus 1–2</b>                                      | <b>2.81 (0.84–9.32)</b>          | <b>0.09</b> | <b>3.51 (1.24–6.96)</b>          | <b>0.02</b>  |
| <b>4–5 versus 1–2</b>                                    | <b>5.45 (1.39–8.43)</b>          | <b>0.02</b> | <b>4.14 (1.43–9.63)</b>          | <b>0.009</b> |
| Serum C3 levels (low vs high)                            | 1.01 (0.36–2.79)                 | 0.98        |                                  |              |
| 24-hour proteinuria (<3.5g/24h vs >3.5 g/24h)            | 2.58 (1.12–5.95)                 | 0.04        |                                  |              |
| Complement pathogenic variants (no vs yes)               | 1.50 (0.73–3.78)                 | 0.39        |                                  |              |
| Autoantibodies against complement regulators (no vs yes) | 1.33 (0.48–3.71)                 | 0.58        |                                  |              |
| Glomerulosclerosis                                       |                                  |             |                                  |              |
| 25–50% vs <25%                                           | 1.18 (0.32–4.39)                 | 0.81        |                                  |              |
| 50–75% vs <25%                                           | 1.13 (0.29–4.45)                 | 0.86        |                                  |              |
| >75% vs <25%                                             | 1.08 (0.08–9.76)                 | 0.95        |                                  |              |
| <b>Interstitial fibrosis/tubular atrophy</b>             |                                  |             |                                  |              |
| 25–50% vs <25%                                           | 1.34 (0.33–5.42)                 | 0.68        |                                  |              |
| 50–75% vs <25%                                           | 2.83 (0.62–6.81)                 | 0.18        |                                  |              |
| <b>&gt;75% vs &lt;25%</b>                                | <b>5.77 (1.03–13.1)</b>          | <b>0.04</b> | <b>6.45 (1.88–9.52)</b>          | <b>0.004</b> |
| RAS blockade (no vs yes)                                 | 1.03 (0.61–1.73)                 | 0.92        |                                  |              |
| <b>Corticosteroids + MMF (no vs yes)</b>                 | <b>0.27 (0.09–0.84)</b>          | <b>0.02</b> | <b>0.25 (0.09–0.62)</b>          | <b>0.003</b> |
| Other immunosuppressive therapy (no vs yes)              | 0.64 (0.18–2.27)                 | 0.49        |                                  |              |
| Treatment with eculizumab (no vs yes)                    | 0.37 (0.09–0.84)                 | 0.18        |                                  |              |

\*Number of events: 40

Abbreviations: CI: confidence interval; MMF: mycophenolate mofetil; RAS: renin-angiotensin system; vs: versus

**Supplemental Table 8:** Clinical and histopathologic characteristics of patients before and after propensity score matching analysis

| Variable                                         | Before propensity-score matching |                   |        |       | After propensity-score matching |                   |        |       |
|--------------------------------------------------|----------------------------------|-------------------|--------|-------|---------------------------------|-------------------|--------|-------|
|                                                  | MMF<br>(n=42)                    | Non-MMF<br>(n=55) | p      | d*    | MMF<br>(n=34)                   | Non-MMF<br>(n=34) | p      | d*    |
| <b>Baseline</b>                                  |                                  |                   |        |       |                                 |                   |        |       |
| Age at diagnosis, years                          | 30±19                            | 33±21             | 0.56   |       | 29±20                           | 30±22             | 0.75   |       |
| Gender, males (%)                                | 23 (55)                          | 31 (56)           | 0.88   |       | 17 (50)                         | 19 (56)           | 0.63   |       |
| C3 glomerulonephritis / Dense deposit disease, N | 40 / 2                           | 41 / 14           | <0.001 | -0.96 | 30 / 4                          | 29 / 5            | 0.80   | 0.17  |
| Serum creatinine, mg/dl                          | 1.3 [0.7-2.4]                    | 1.8 [0.8-3.5]     | 0.05   | -0.67 | 1 [0.6-2.4]                     | 1.1 [0.7-2.1]     | 0.75   | 0.07  |
| Albumin, g/dl                                    | 3.1±0.8                          | 3±0.8             | 0.65   |       | 3.2±0.7                         | 3.1±0.8           | 0.59   |       |
| Serum C3 <sup>a</sup> , mg/dl                    | 61±45                            | 61±36             | 0.96   |       | 62±46                           | 68±38             | 0.56   |       |
| Serum C4 <sup>b</sup> , mg/dl                    | 23±8                             | 25±10             | 0.29   |       | 22±9                            | 25±11             | 0.26   |       |
| Proteinuria, g/24h                               | 3 [1.8-4.6]                      | 2.9 [1.5-8.8]     | 0.69   | -0.31 | 2.6 [1.5-4]                     | 2.3 [1-6]         | 0.81   | -0.19 |
| <b>Histopathology</b>                            |                                  |                   |        |       |                                 |                   |        |       |
| Light microscopy pattern, N (%)                  |                                  |                   | 0.26   |       |                                 |                   | 0.59   |       |
| Membranoproliferative GN                         | 31 (74)                          | 39 (71)           |        |       | 25 (75)                         | 25 (75)           |        |       |
| Endocapillary proliferative GN                   | 4 (10)                           | 3 (6)             |        |       | 2 (5)                           | 4 (10)            |        |       |
| Mesangial proliferative GN                       | 6 (14)                           | 9 (16)            |        |       | 2 (5)                           | 5 (15)            |        |       |
| Diffuse sclerosing GN                            | 1 (2)                            | 4 (7)             |        |       | 5 (15)                          | 0 (0)             |        |       |
| Globally sclerotic glomeruli, %                  | 5 [0–9]                          | 20 [0–40]         | 0.01   | -0.61 | 4 [0–11]                        | 4 [0–21]          | 0.66   | -0.14 |
| Cellular or fibrocellular crescents, N (%)       | 11 (26)                          | 13 (24)           | 0.77   |       | 8 (24)                          | 6 (18)            | 0.55   |       |
| Tubular atrophy/interstitial fibrosis, N %       |                                  |                   | 0.09   | -0.44 |                                 |                   | 0.78   | 0.04  |
| Absence                                          | 18 (43)                          | 18 (33)           |        |       | 16 (24)                         | 13 (19)           |        |       |
| Mild                                             | 17 (41)                          | 15 (27)           |        |       | 11 (32)                         | 13 (19)           |        |       |
| Moderate                                         | 4 (10)                           | 15 (27)           |        |       | 4 (12)                          | 7 (10)            |        |       |
| Severe                                           | 3 (7)                            | 7 (13)            |        |       | 3 (9)                           | 1 (3)             |        |       |
| Arterio- and arteriosclerosis, %                 | 7 (17)                           | 17 (31)           | 0.11   |       | 5 (15)                          | 9 (26)            | 0.23   |       |
| <b>Outcomes</b>                                  |                                  |                   |        |       |                                 |                   |        |       |
| Follow-up, months                                | 49 [23–97]                       | 45 [12–81]        | 0.27   |       | 38 [16–90]                      | 43 [19–50]        | 0.72   |       |
| Complete remission, N (%)                        | 15 (36)                          | 3 (6)             | <0.001 |       | 13 (38)                         | 1 (3)             | <0.001 |       |
| Remission (complete+partial), N (%)              | 33 (79)                          | 13 (24)           | <0.001 |       | 28 (82)                         | 9 (27)            | <0.001 |       |
| Kidney failure, N (%)                            | 6 (14)                           | 34 (62)           | <0.001 |       | 4 (12)                          | 18 (53)           | <0.001 |       |

\*d: Cohen's standardized mean differences

Continuous variables are presented as mean±standard deviation, or median [interquartile range]

Abbreviations: GN: glomerulonephritis; MMF: mycophenolate mofetil;

<sup>a</sup> Reference values: 75–135

<sup>b</sup> Reference values: 14–60

**Supplemental Table 9:** Cox proportional hazard regression analysis for predictors of no response to corticosteroids plus mycophenolate mofetil\*

| <i>Variable</i>                                                | <i>Univariable</i>               |             | <i>Multivariable</i>             |             |
|----------------------------------------------------------------|----------------------------------|-------------|----------------------------------|-------------|
|                                                                | <i>Hazard ratio<br/>(95% CI)</i> | <i>P</i>    | <i>Hazard ratio<br/>(95% CI)</i> | <i>P</i>    |
| Gender ( <b>female vs male</b> )                               | 1.16 (0.63–2.15)                 | 0.64        |                                  |             |
| Age ( <b>pediatric vs adult</b> )                              | 1.07 (0.96–1.16)                 | 0.06        |                                  |             |
| C3 glomerulonephritis/Dense deposit disease                    | 0.28 (0.02–5.11)                 | 0.39        |                                  |             |
| CKD stages at baseline                                         |                                  |             |                                  |             |
| 3 versus 1–2                                                   | 0.48 (0.07–3.38)                 | 0.46        |                                  |             |
| 4–5 versus 1–2                                                 | 0.73 (0.21–4.53)                 | 0.53        |                                  |             |
| <b>24-hour proteinuria<br/>(&lt;3.5g/24h vs &gt;3.5 g/24h)</b> | <b>1.48 (1.21–1.96)</b>          | <b>0.06</b> | <b>1.23 (1.02–1.46)</b>          | <b>0.03</b> |
| Complement pathogenic variants (no vs yes)                     | 0.99 (0.09–5.54)                 | 0.99        |                                  |             |
| Autoantibodies against complement regulators (no vs yes)       | 0.19 (0.02–1.61)                 | 0.13        |                                  |             |
| Glomerulosclerosis                                             |                                  |             |                                  |             |
| 25–50% vs <25%                                                 | 1.08 (0.47–2.47)                 | 0.85        |                                  |             |
| 50–75% vs <25%                                                 | 2.25 (0.86–5.92)                 | 0.12        |                                  |             |
| >75% vs <25%                                                   | 5.21 (0.58–7.32)                 | 0.21        |                                  |             |
| Interstitial fibrosis/tubular atrophy                          |                                  |             |                                  |             |
| 25–50% vs <25%                                                 | 1.01 (0.43–2.36)                 | 0.98        |                                  |             |
| 50–75% vs <25%                                                 | 2.04 (0.87–4.82)                 | 0.12        |                                  |             |
| >75% vs <25%                                                   | 1.66 (0.66–4.22)                 | 0.28        |                                  |             |

\*Number of events: 9

Abbreviations: CI: confidence interval; vs: versus

**Supplemental Table 10:** Clinical, histopathologic and genetic characteristics of patients treated with mycophenolate mofetil plus corticosteroids according to relapse of the disease.

| <i>Variable</i>                                       | <i>Relapse of the disease</i><br>(n=11) | <i>No relapse after initial remission</i><br>(n=22) | <i>p</i> |
|-------------------------------------------------------|-----------------------------------------|-----------------------------------------------------|----------|
| <b>Baseline</b>                                       |                                         |                                                     |          |
| Age at diagnosis, years                               | 20±17                                   | 35±20                                               | 0.03     |
| Gender, males (%)                                     | 5 (46)                                  | 11 (50)                                             | 0.81     |
| Adult % / Pediatric %                                 | 36 / 64                                 | 82 / 18                                             | 0.009    |
| C3 glomerulonephritis / Dense deposit disease, N      | 11 / 0                                  | 21 / 1                                              | 0.48     |
| Clinical presentation, N (%)                          |                                         |                                                     | 0.16     |
| Nephrotic syndrome                                    | 6 (55)                                  | 5 (23)                                              |          |
| Nephritic syndrome                                    | 3 (27)                                  | 8 (36)                                              |          |
| Asymptomatic urinary abnormalities                    | 2 (18)                                  | 9 (41)                                              |          |
| Serum creatinine, mg/dl                               | 0.6 [0.5–1.3]                           | 1.8 [0.8–2.9]                                       | <0.001   |
| Albumin, g/dl                                         | 3.1±0.6                                 | 3.3±0.9                                             | 0.56     |
| Proteinuria, g/24h                                    | 1.9 [1.1–3.4]                           | 2.9 [1.8–4]                                         | 0.26     |
| Serum C3 <sup>a</sup> , mg/dl                         | 42±36                                   | 69±44                                               | 0.08     |
| Serum C5b–9 <sup>b</sup> , mg/l                       | 600 [220–1549]                          | 295 [182–621]                                       | 0.12     |
| <b>Histopathology</b>                                 |                                         |                                                     |          |
| Globally sclerotic glomeruli, %                       | 0 [0–6]                                 | 5 [0–11]                                            | 0.19     |
| Tubular atrophy/interstitial fibrosis, N %            |                                         |                                                     | 0.14     |
| Absence                                               | 6 (55)                                  | 8 (36)                                              |          |
| Mild                                                  | 5 (46)                                  | 10 (46)                                             |          |
| Moderate                                              | 0 (0)                                   | 2 (9)                                               |          |
| Severe                                                | 0 (0)                                   | 2 (9)                                               |          |
| <b>Complement genetic analysis</b>                    |                                         |                                                     |          |
| Complement abnormalities <sup>c</sup> , N (%)         |                                         |                                                     | 0.41     |
| None                                                  | 5 (46)                                  | 10 (46)                                             |          |
| Variants of unknown significance                      | 4 (36)                                  | 11 (50)                                             |          |
| Pathogenic variants                                   | 2 (18)                                  | 1 (4)                                               |          |
| Autoantibodies, N (%)                                 | 1 (9)                                   | 7 (32)                                              | 0.15     |
| <b>Treatment</b>                                      |                                         |                                                     |          |
| Mean initial daily dose of corticosteroids, mg/kg/day | 0.9±0.6                                 | 0.9±0.3                                             | 0.94     |
| Median initial duration of corticosteroids, months    | 7 [4–20]                                | 13 [6–18]                                           | 0.12     |
| Mean initial daily dose of MMF, mg/day                | 1110±720                                | 1000±500                                            | 0.75     |
| Median initial duration of MMF, months                | 7 [2–17]                                | 11 [7–27]                                           | 0.11     |
| Serum creatinine at remission <sup>d</sup> , mg/dl    | 0.7 [0.5–0.8]                           | 0.9 [0.7–1.5]                                       | 0.09     |
| Serum C3 at remission <sup>d</sup> , mg/dl            | 66±47                                   | 81±29                                               | 0.44     |
| Serum albumin at remission <sup>d</sup> , g/dl        | 3.8±0.7                                 | 3.9±0.3                                             | 0.55     |
| Proteinuria at remission <sup>d</sup> , g/24h         | 0.7 [0.2–1.6]                           | 0.9 [0.4–1.5]                                       | 0.76     |

Continuous variables are presented as mean±standard deviation, or median [interquartile range]

Abbreviations: MMF: mycophenolate mofetil

<sup>a</sup> Reference values: 75–135

<sup>b</sup> Reference values: <100

<sup>c</sup> Information regarding complement pathogenic abnormalities is provided in Supplemental Table 2

<sup>d</sup> Including both partial+complete remission



**Supplemental Table 11:** Cox proportional hazard regression analysis for predictors of relapse in patients treated with corticosteroids plus mycophenolate mofetil\*

| <i>Variable</i>                                              | <i>Univariable</i>           |             | <i>Multivariable</i>         |             |
|--------------------------------------------------------------|------------------------------|-------------|------------------------------|-------------|
|                                                              | <i>Hazard ratio (95% CI)</i> | <i>P</i>    | <i>Hazard ratio (95% CI)</i> | <i>P</i>    |
| Gender (female vs male)                                      | 1.61 (0.22–2.18)             | 0.64        |                              |             |
| Age (pediatric vs adult)                                     | 0.63 (0.83–4.90)             | 0.66        |                              |             |
| C3 glomerulonephritis/Dense deposit disease                  | 0.98 (0.75–1.22)             | 0.72        |                              |             |
| CKD stages at remission                                      |                              |             |                              |             |
| 3 versus 1–2                                                 | 1.29 (0.28–5.94)             | 0.74        |                              |             |
| 4–5 versus 1–2                                               | 3.52 (0.53–7.58)             | 0.62        |                              |             |
| 24-hour proteinuria at remission (<3.5g/24h vs >3.5 g/24h)   | 1.13 (0.79–1.62)             | 0.51        |                              |             |
| Median length of corticosteroids (<6 months vs >6 months)    | 0.98 (0.87–1.09)             | 0.68        |                              |             |
| <b>Median length of MMF (&lt;12 months vs &gt;12 months)</b> | <b>0.97 (0.03–0.74)</b>      | <b>0.02</b> | <b>0.18 (0.04–0.87)</b>      | <b>0.03</b> |

\*Number of events: 11

Abbreviations: CI: confidence interval; MMF: mycophenolate mofetil

**Supplemental Figure 1:** Dot plot for the propensity scores of patients in the MMF and non-MMF groups showing individual units in the dataset and whether they were matched or not.

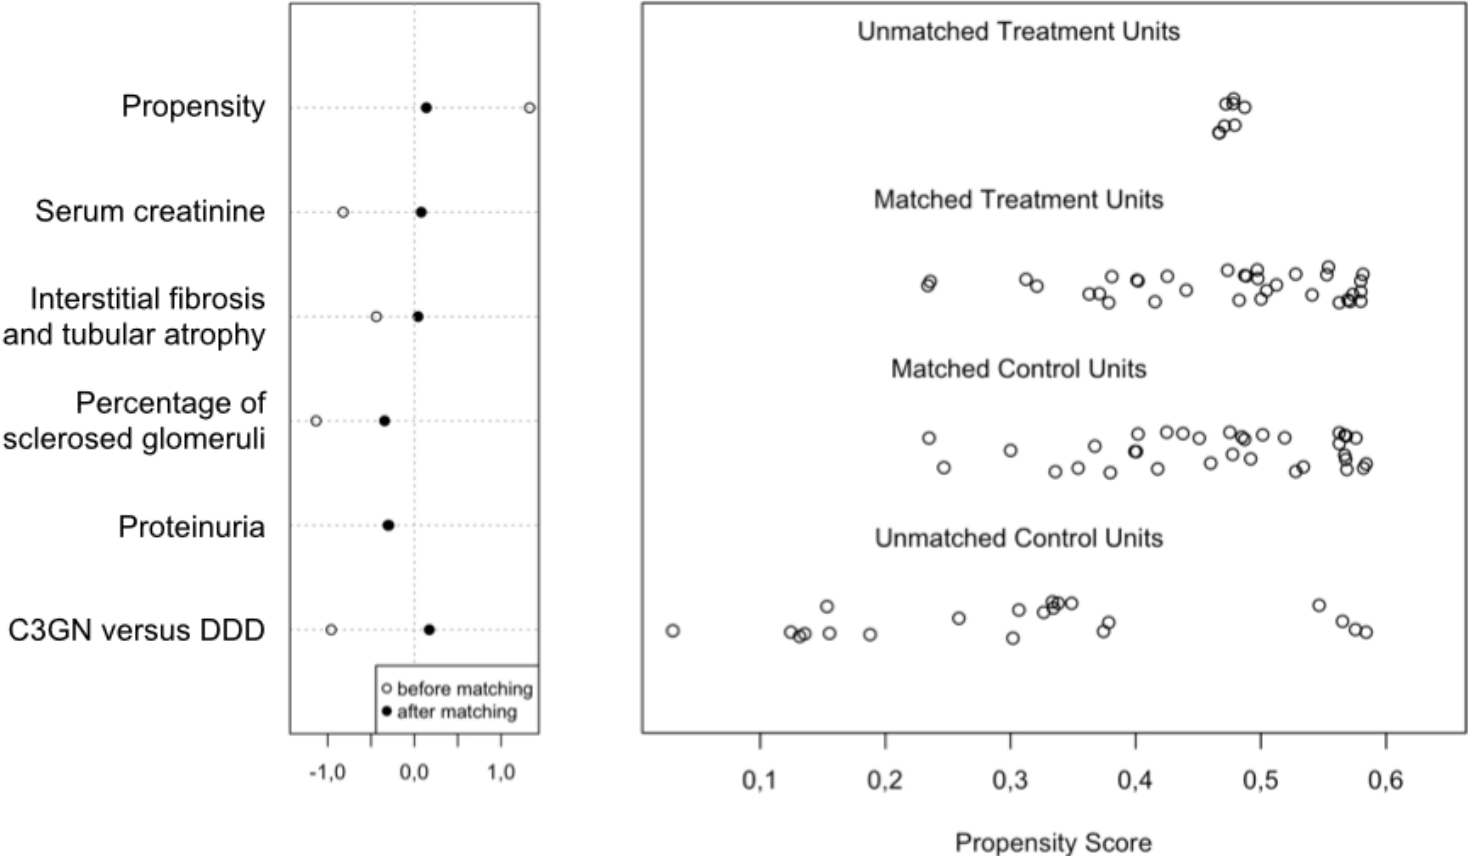

**Supplemental Figure 2:** Kaplan-Meier curves for kidney survival according to cluster analysis in patients treated with corticosteroids plus MMF versus other regimens.

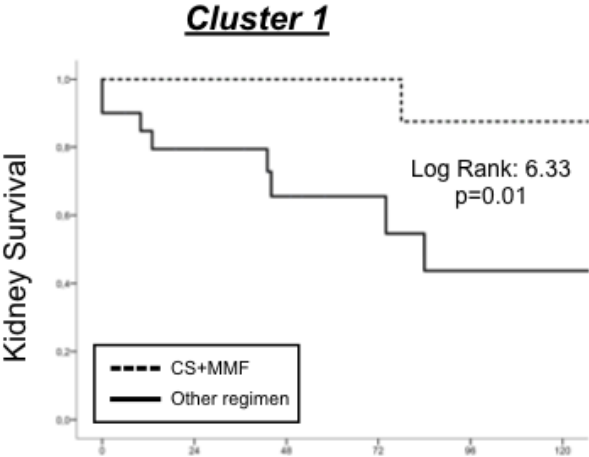

| Patients at risk      | Months |    |    |    |    |     |
|-----------------------|--------|----|----|----|----|-----|
|                       | 0      | 24 | 48 | 72 | 96 | 120 |
| Corticosteroids + MMF | 14     | 13 | 10 | 9  | 5  | 2   |
| Other regimen         | 20     | 16 | 9  | 6  | 4  | 2   |

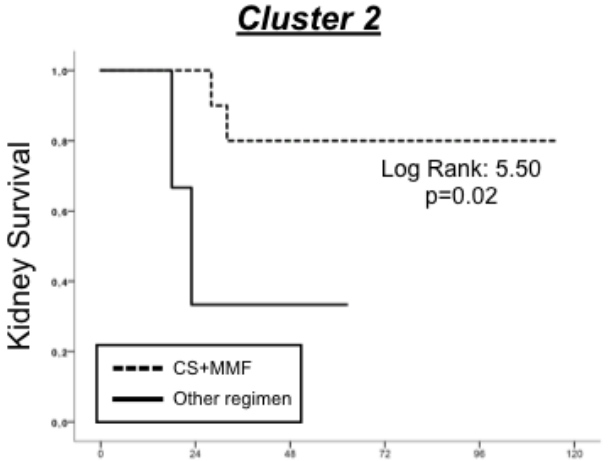

| Patients at risk      | Months |    |    |    |    |     |
|-----------------------|--------|----|----|----|----|-----|
|                       | 0      | 24 | 48 | 72 | 96 | 120 |
| Corticosteroids + MMF | 11     | 10 | 8  | 5  | 3  | 2   |
| Other regimen         | 3      | 2  | 1  |    |    |     |

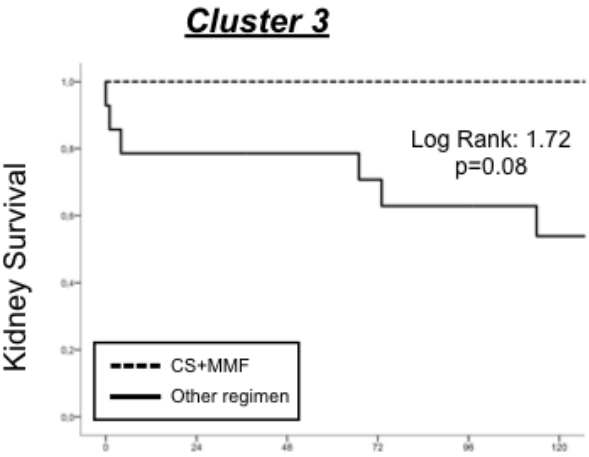

| Patients at risk      | Months |    |    |    |    |     |
|-----------------------|--------|----|----|----|----|-----|
|                       | 0      | 24 | 48 | 72 | 96 | 120 |
| Corticosteroids + MMF | 3      | 3  | 3  | 2  | 2  | 2   |
| Other regimen         | 14     | 10 | 7  | 5  | 3  | 2   |

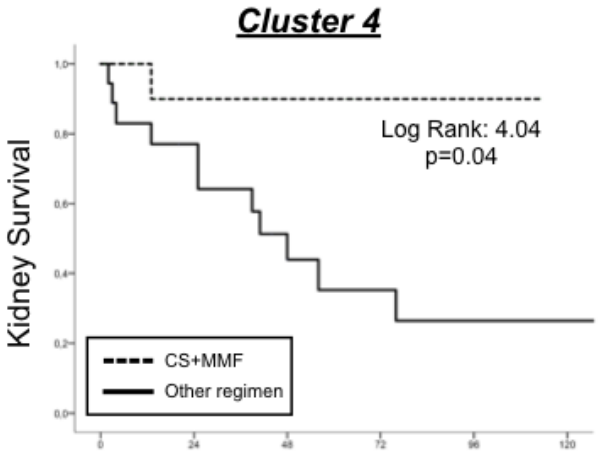

| Patients at risk      | Months |    |    |    |    |     |
|-----------------------|--------|----|----|----|----|-----|
|                       | 0      | 24 | 48 | 72 | 96 | 120 |
| Corticosteroids + MMF | 14     | 10 | 6  | 1  | 1  |     |
| Other regimen         | 18     | 12 | 7  | 4  | 3  | 3   |
